# Supplementary material for: Prednisolone pharmacokinetics in dogs with protein‐losing enteropathy
Source: PubMed Central journal article supplement — J Vet Intern Med. 2024 Dec 23;39(1):e17277. doi: 10.1111/jvim.17277 (PMC11665961; doi:10.1111/jvim.17277), 2024-12-23
Supplement: JVIM-39-e17277-s001.pdf [file JVIM-39-e17277-s001.pdf]

## Prednisone PK Study Medication Log

|                            |                   |
|----------------------------|-------------------|
| Animal (Case) ID: PPKPLE13 |                   |
| Client Name: _____         | Pet's Name: _____ |

| Date    | Dose Taken?                                                | Time of Dose | Comments    | Initials |
|---------|------------------------------------------------------------|--------------|-------------|----------|
| 7/27/23 | <input checked="" type="radio"/> Y <input type="radio"/> N | 7:45a        | given @ MSU | W        |
| 7.28.23 | <input checked="" type="radio"/> Y <input type="radio"/> N | 9:45 am      | @ home      | K.A.     |
| 7.29.23 | <input checked="" type="radio"/> Y <input type="radio"/> N | 10:00 am.    | "           | A.A.     |
| 7.30.23 | <input checked="" type="radio"/> Y <input type="radio"/> N | 9:57 am.     | "           | A.A.     |
| 7.31.23 | <input checked="" type="radio"/> Y <input type="radio"/> N | 9:50 am      | "           | A.A.     |
| 8.1.23  | <input checked="" type="radio"/> Y <input type="radio"/> N | 10:00 am.    | "           | A.A.     |
| 8.2.23  | <input checked="" type="radio"/> Y <input type="radio"/> N | 9:55 am.     | "           | A.A.     |
| 8.3.23  | <input checked="" type="radio"/> Y <input type="radio"/> N | 9:50 am      | "           | A.A.     |
| 8.4.23  | <input checked="" type="radio"/> Y <input type="radio"/> N | 10:00 am     | "           | A.A.     |
| 8.5.23  | <input checked="" type="radio"/> Y <input type="radio"/> N | 9:53 am      | "           | A.A.     |
| 8.6.23  | <input checked="" type="radio"/> Y <input type="radio"/> N | 10:02 am     | "           | A.A.     |
| 8.7.23  | <input checked="" type="radio"/> Y <input type="radio"/> N | 9:47 am      | "           | A.A.     |
| 8.8.23  | <input checked="" type="radio"/> Y <input type="radio"/> N | 9:44 am.     | "           | A.A.     |
| 8.9.23  | <input checked="" type="radio"/> Y <input type="radio"/> N | 9:55 am      | "           | A.A.     |
| 8.10.23 | <input checked="" type="radio"/> Y <input type="radio"/> N | 10:05 am     | "           | A.A.     |
| 8.11.23 | <input checked="" type="radio"/> Y <input type="radio"/> N | 10:00 am     | "           | A.A.     |
| 8.12.23 | <input checked="" type="radio"/> Y <input type="radio"/> N | 9:49 am      | "           | A.A.     |
| 8.13.23 | <input checked="" type="radio"/> Y <input type="radio"/> N | 10:05 am     | "           | A.A.     |
| 8.14.23 | <input checked="" type="radio"/> Y <input type="radio"/> N | 10:10 am     | "           | A.A.     |
| 8/15/23 | <input checked="" type="radio"/> Y <input type="radio"/> N | 8:10 am      | given @ MSU | W        |
|         | <input type="radio"/> Y <input type="radio"/> N            |              |             |          |
|         | <input type="radio"/> Y <input type="radio"/> N            |              |             |          |

Your Next Appointment is on 8.15.23. Please bring this document.
