# Supplementary material for: Prednisolone pharmacokinetics in dogs with protein‐losing enteropathy
Source: PubMed Central journal article supplement — J Vet Intern Med. 2024 Dec 23;39(1):e17277. doi: 10.1111/jvim.17277 (PMC11665961; doi:10.1111/jvim.17277), 2024-12-23
Supplement: JVIM-39-e17277-s002.pdf [file JVIM-39-e17277-s002.pdf]

**Supporting Information- Table S1.** Pre- and post- T1 diets in dogs with protein-losing enteropathy

| <b>PLE Dog</b> | <b>Diet at time of presentation</b>                             | <b>Treatment diet</b>                                         |                         |                              |                          |                         |
|----------------|-----------------------------------------------------------------|---------------------------------------------------------------|-------------------------|------------------------------|--------------------------|-------------------------|
| 1              | Fromm Four-Star Nutritional's Pork & Applesauce Dry Dog Food    | Royal Canin Veterinary Diet® Gastrointestinal Low Fat LF Loaf |                         |                              |                          |                         |
|                |                                                                 | <b>Protein source</b>                                         | <b>Major CHO source</b> | <b>Protein (g/1000 kcal)</b> | <b>Fat (g/1000 kcal)</b> | <b>TDF (g/100 kcal)</b> |
|                |                                                                 | Pork                                                          | Brewer's rice           | 77.5                         | 18.1                     | 26.9                    |
| 2              | Hills Prescription Diet® i/d® Low Fat Dry                       | Royal Canin Veterinary Diet® Gastrointestinal Low Fat LF Loaf |                         |                              |                          |                         |
|                |                                                                 | <b>Protein source</b>                                         | <b>Major CHO source</b> | <b>Protein (g/1000 kcal)</b> | <b>Fat (g/1000 kcal)</b> | <b>TDF (g/100 kcal)</b> |
|                |                                                                 | Pork                                                          | Brewer's rice           | 77.5                         | 18.1                     | 26.9                    |
| 3              | Purina ONE Chicken and Rice Formula Dry Food                    | Royal Canin Veterinary Diet® Gastrointestinal Low Fat LF Dry  |                         |                              |                          |                         |
|                |                                                                 | <b>Protein source</b>                                         | <b>Major CHO source</b> | <b>Protein (g/1000 kcal)</b> | <b>Fat (g/1000 kcal)</b> | <b>TDF (g/100 kcal)</b> |
|                |                                                                 | Chicken                                                       | Brewer's rice           | 63.7                         | 18.8                     | 25.2                    |
| 4              | Nutrisource Small Bites Adult Chicken & Rice Dry Dog Food       | Royal Canin Veterinary Diet® Gastrointestinal Low Fat LF Loaf |                         |                              |                          |                         |
|                |                                                                 | <b>Protein source</b>                                         | <b>Major CHO source</b> | <b>Protein (g/1000 kcal)</b> | <b>Fat (g/1000 kcal)</b> | <b>TDF (g/100 kcal)</b> |
|                |                                                                 | Pork                                                          | Brewer's rice           | 77.5                         | 18.1                     | 26.9                    |
| 5              | Royal Canin Veterinary Diet® Hydrolyzed Protein HP Dry Dog Food | Royal Canin Veterinary Diet® Gastrointestinal Low Fat LF Loaf |                         |                              |                          |                         |
|                |                                                                 | <b>Protein source</b>                                         | <b>Major CHO source</b> | <b>Protein (g/1000 kcal)</b> | <b>Fat (g/1000 kcal)</b> | <b>TDF (g/100 kcal)</b> |
|                |                                                                 | Pork                                                          | Brewer's rice           | 77.5                         | 18.1                     | 26.9                    |
| 6              | Hills Prescription Diet® z/d® Dry (Original Flavor)             | Royal Canin Veterinary Diet® Gastrointestinal Low Fat LF Loaf |                         |                              |                          |                         |
|                |                                                                 | <b>Protein source</b>                                         | <b>Major CHO source</b> | <b>Protein (g/1000 kcal)</b> | <b>Fat (g/1000 kcal)</b> | <b>TDF (g/100 kcal)</b> |
|                |                                                                 | Pork                                                          | Brewer's rice           | 77.5                         | 18.1                     | 26.9                    |

|    |                                                                                                   |                                                               |                         |                              |                          |                          |
|----|---------------------------------------------------------------------------------------------------|---------------------------------------------------------------|-------------------------|------------------------------|--------------------------|--------------------------|
| 7  | Purina Pro Plan® Shredded Blend Chicken & Rice                                                    | Purina® Pro Plan® Veterinary Diet HA Hydrolyzed® Vegetarian   |                         |                              |                          |                          |
|    |                                                                                                   | <b>Protein source</b>                                         | <b>Major CHO source</b> | <b>Protein (g/1000 kcal)</b> | <b>Fat (g/1000 kcal)</b> | <b>TDF (g/1000 kcal)</b> |
|    |                                                                                                   | Hydrolyzed soy                                                | Corn starch             | 53.6                         | 26.5                     | 11.6                     |
| 8  | Royal Canin Veterinary Diet® Gastrointestinal Low Fat LF Dry & Purina Pro Plan® EN Low Fat Canned | Tilapia, sweet potato & rice- home prepared diet              |                         |                              |                          |                          |
|    |                                                                                                   | <b>Protein source</b>                                         | <b>Major CHO source</b> | <b>Protein (g/1000 kcal)</b> | <b>Fat (g/1000 kcal)</b> | <b>TDF (g/1000 kcal)</b> |
|    |                                                                                                   | Tilapia                                                       | Sweet potato, rice      | 112                          | 12                       | 12.2                     |
| 9  | Solid Gold Mighty Mini Toy & Small Breed                                                          | Royal Canin Veterinary Diet® Gastrointestinal Low Fat LF Loaf |                         |                              |                          |                          |
|    |                                                                                                   | <b>Protein source</b>                                         | <b>Major CHO source</b> | <b>Protein (g/1000 kcal)</b> | <b>Fat (g/1000 kcal)</b> | <b>TDF (g/1000 kcal)</b> |
|    |                                                                                                   | Pork                                                          | Brewer's rice           | 77.5                         | 18.1                     | 26.9                     |
| 10 | Hills Prescription Diet® z/d® Dry (Original Flavor)                                               | Purina® Pro Plan® Veterinary Diet HA Hydrolyzed® Vegetarian   |                         |                              |                          |                          |
|    |                                                                                                   | <b>Protein source</b>                                         | <b>Major CHO source</b> | <b>Protein (g/1000 kcal)</b> | <b>Fat (g/1000 kcal)</b> | <b>TDF (g/1000 kcal)</b> |
|    |                                                                                                   | Hydrolyzed soy                                                | Corn starch             | 53.6                         | 26.5                     | 11.6                     |
| 11 | Purina Pro Plan® Complete Essentials Dry Dog Food                                                 | Royal Canin Veterinary Diet® Gastrointestinal Low Fat LF Loaf |                         |                              |                          |                          |
|    |                                                                                                   | <b>Protein source</b>                                         | <b>Major CHO source</b> | <b>Protein (g/1000 kcal)</b> | <b>Fat (g/1000 kcal)</b> | <b>TDF (g/1000 kcal)</b> |
|    |                                                                                                   | Pork                                                          | Brewer's rice           | 77.5                         | 18.1                     | 26.9                     |
| 12 | Hills Prescription Diet® i/d® Low Fat Dry                                                         | Royal Canin Veterinary Diet® Gastrointestinal Low Fat LF Loaf |                         |                              |                          |                          |
|    |                                                                                                   | <b>Protein source</b>                                         | <b>Major CHO source</b> | <b>Protein (g/1000 kcal)</b> | <b>Fat (g/1000 kcal)</b> | <b>TDF (g/1000 kcal)</b> |
|    |                                                                                                   | Pork                                                          | Brewer's rice           | 77.5                         | 18.1                     | 26.9                     |

|    |                                                                 |                                                             |                         |                              |                          |                          |
|----|-----------------------------------------------------------------|-------------------------------------------------------------|-------------------------|------------------------------|--------------------------|--------------------------|
| 13 | Purina Pro Plan® Sensitive Skin & Stomach Adult Lamb & Oat meal | Purina® Pro Plan® Veterinary Diet HA Hydrolyzed® Vegetarian |                         |                              |                          |                          |
|    |                                                                 | <b>Protein source</b>                                       | <b>Major CHO source</b> | <b>Protein (g/1000 kcal)</b> | <b>Fat (g/1000 kcal)</b> | <b>TDF (g/1000 kcal)</b> |
|    |                                                                 | Hydrolyzed soy                                              | Corn starch             | 53.6                         | 26.5                     | 11.6                     |
| 14 | Purina ONE Chicken and Rice Formula Dry Food                    | Purina® Pro Plan® Veterinary Diet HA Hydrolyzed® Vegetarian |                         |                              |                          |                          |
|    |                                                                 | <b>Protein source</b>                                       | <b>Major CHO source</b> | <b>Protein (g/1000 kcal)</b> | <b>Fat (g/1000 kcal)</b> | <b>TDF (g/1000 kcal)</b> |
|    |                                                                 | Hydrolyzed soy                                              | Corn starch             | 53.6                         | 26.5                     | 11.6                     |

Abbreviations: CHO, carbohydrate; TDF, total dietary fiber
