# Supplementary material for: Prednisolone pharmacokinetics in dogs with protein‐losing enteropathy
Source: PubMed Central journal article supplement — J Vet Intern Med. 2024 Dec 23;39(1):e17277. doi: 10.1111/jvim.17277 (PMC11665961; doi:10.1111/jvim.17277), 2024-12-23
Supplement: JVIM-39-e17277-s003.pdf [file JVIM-39-e17277-s003.pdf]

**Supporting Information Table S2** – Baseline demographic, clinical, and biochemical data in 14 dogs with protein-losing enteropathy

| Dog | Age (years) | Sex | Breed                          | Weight (kg) | BCS (0-9) | Duration of CS (weeks) | CCECAI | PFS | Alb (g/dL)<br>RI 2.8-3.6 g/dL | Glob (g/dL)<br>RI 2.3-3.7 g/dL | Chol (mg/dL)<br>RI 126-325 mg/dL | iCa (mmol/L)<br>RI 1.25-1.45 mmol/L | 25(OH)D (nmol/L)<br>RI 109-423 nmol/L | B12 (ng/L)<br>RI 251-908 ng/L | Folate (µg/L)<br>RI 7.7-24.4 µg/L |
|-----|-------------|-----|--------------------------------|-------------|-----------|------------------------|--------|-----|-------------------------------|--------------------------------|----------------------------------|-------------------------------------|---------------------------------------|-------------------------------|-----------------------------------|
| 1   | 2           | FS  | Pitbull                        | 24          | 5         | 4                      | 18     | 7   | 1.3                           | 1.5                            | 53                               | 1.32                                | 13                                    | 363                           | 7.1                               |
| 2   | 6           | FS  | Mixed                          | 22          | 4         | 12                     | 11     | 6   | 1.3                           | 1.9                            | 102                              | 1.24                                | 23                                    | 285                           | 18.8                              |
| 3   | 11          | MC  | GSD                            | 40          | 4         | 3                      | 10     | 5   | 1.1                           | 2.1                            | 160                              | 1.43                                | 22                                    | 213                           | 5.3                               |
| 4   | 6           | MC  | Miniature Australian shepherd  | 9           | 5         | 10                     | 18     | 7   | 1.1                           | 1.4                            | 68                               | 1.07                                | 18                                    | 206                           | 8                                 |
| 5   | 5           | MC  | French bulldog                 | 14          | 5         | 20                     | 11     | 7   | 2.3                           | 1.9                            | 187                              | 1.42                                | 154                                   | 632                           | 16.4                              |
| 6   | 3           | FS  | Yorkshire terrier              | 3.5         | 3         | 12                     | 19     | 7   | 1                             | 1.2                            | 75                               | 1.16                                | 17                                    | <150                          | 6.4                               |
| 7   | 9           | FS  | Newfoundland                   | 40          | 6         | 8                      | 10     | 7   | 1.5                           | 1.9                            | 117                              | 1.3                                 | 19                                    | <150                          | 4.2                               |
| 8   | 2           | FS  | Labrador retriever             | 35          | 5         | 7                      | 11     | 6   | 1.6                           | 1.4                            | 81                               | 1.3                                 | 35                                    | 171                           | 12.3                              |
| 9   | 12          | MC  | Mixed                          | 6           | 4         | 4                      | 17     | 6   | 1.1                           | 1.6                            | 100                              | 1.25                                | 19                                    | <150                          | 14                                |
| 10  | 2           | MC  | GSD                            | 36          | 5         | 16                     | 7      | 6   | 2.3                           | 2.6                            | 110                              | 1.39                                | 152                                   | <150                          | 44.4                              |
| 11  | 4           | MC  | Jack Russell terrier           | 12          | 6         | 4                      | 9      | 7   | 1.1                           | 1.3                            | 65                               | 1.1                                 | 12                                    | 430                           | 14.9                              |
| 12  | 7           | MC  | King Charles Cavalier spaniel  | 13          | 5         | 6                      | 9      | 4   | 1.3                           | 1.6                            | 78                               | 1.24                                | 12                                    | 225                           | 11.1                              |
| 13  | 6           | MC  | Labrador retriever             | 30          | 4         | 12                     | 5      | 5   | 1.4                           | 1.7                            | 143                              | 1.4                                 | 24                                    | 224                           | 10                                |
| 14  | 7           | FS  | American staffordshire terrier | 26          | 5         | 12                     | 6      | 6   | 1.3                           | 1.6                            | 101                              | 1.32                                | 23                                    | 227                           | 14.9                              |

Abbreviations: FS, female spayed; MC, male castrated; GSD, German shepherd dog; BCS, body condition score; CS, clinical signs; CCECAI, canine chronic enteropathy activity index; Alb, albumin, Glob, globulin; Chol, cholesterol, iCa, ionized calcium; PFS, Purina® fecal score; RI, reference interval.
