# Supplementary material for: Prednisolone pharmacokinetics in dogs with protein‐losing enteropathy
Source: PubMed Central journal article supplement — J Vet Intern Med. 2024 Dec 23;39(1):e17277. doi: 10.1111/jvim.17277 (PMC11665961; doi:10.1111/jvim.17277), 2024-12-23
Supplement: JVIM-39-e17277-s004.pdf [file JVIM-39-e17277-s004.pdf]

### **Prednisolone Assay Description**

Two-hundred  $\mu\text{L}$  of serum was combined with 600  $\mu\text{L}$  acetonitrile (Fisher Scientific reagent grade, Waltham MA), mixed by vortexing, and centrifuged to remove insoluble particulates. The mixture was passed through a 0.2  $\mu\text{m}$  Pall Bio-inert filter (Pall Corporation, VWR International, Radnor PA) and 250  $\mu\text{L}$  was transferred to an autosampler vial for chromatography. This preparation was used for determination of total serum prednisolone concentrations, and additional descriptions of the assay can be found elsewhere.<sup>1</sup>

Unbound or non-protein bound prednisolone was extracted by adaptation of the method of Ionita and Akhlaghi.<sup>2</sup> In brief, 300  $\mu\text{L}$  of serum were transferred into individual Microcon centrifugal filter devices with Ultracel YM-10 10,000 Da molecular weight cutoff filters (Millipore, Bedford MA). The filters were capped and equilibrated for 60 minutes at 37°C, then centrifuged at 10000 g for 30 minutes in a benchtop microcentrifuge. One hundred  $\mu\text{L}$  of ultrafiltrate was combined with 10  $\mu\text{L}$  of internal standard solution comprising 50% acetonitrile and 50 ng/mL d7-prednisone (Toronto Research Chemicals, LGC Standards, Toronto ON). An in-line switching valve on the LC-MS/MS instrument enabled trapping of unbound prednisolone and its internal standard on a Strata-X 25  $\mu\text{m}$  extraction cartridge with dimensions 20 x 2.0 mm (Phenomenex, Torrance CA) with washing and backflushing as previously described.<sup>2</sup>

Analyte separation was achieved using a Shimadzu LC30AD ultrahigh-performance liquid chromatography (UHPLC) system (Shimadzu, Kyoto Japan) followed immediately by a Phenomenex (Torrance, CA) Kinetex Biphenyl 100 angstrom column (30  $\times$  2.1 mm i.d., 2.6  $\mu\text{m}$ ). Identification and quantitation were accomplished using an ABSciex 6500+ triple quadrupole mass spectrometer (ABSciex, Framingham MA) with an electrospray ionization source in the negative ionization mode. Chromatographic separation involved a gradient between

mobile phase A (0.1% formic acid [Merck, Millipore Corporation, Bedford MA] in Milli-Q Ultrapure deionized water [Millipore]) and mobile phase B (0.1% formic acid in acetonitrile) which proceeded as 70% A/30% B from 0-1 min, 100% B from 1.0-7.0 min, then 70% A/30% B from 7.0-7.5 min and 70% A/30% B to 8.0 min. A formate adduct of prednisolone and the d7-internal standard generated by this procedure were used to establish MRM settings (see Table S1), which included: 1) prednisolone  $m/z$  405 $\rightarrow$ 329 quantifier, 405 $\rightarrow$ 295 qualifier-1 and 405 $\rightarrow$ 45 qualifier-2; and 2) prednisone-d7  $m/z$  410 $\rightarrow$ 341 quantifier and 410 $\rightarrow$ 110 qualifier.

### References:

1. Heine LK, Benninghoff AD, Ross EA, et al. Comparative effects of human-equivalent low, moderate, and high dose oral prednisone intake on autoimmunity and glucocorticoid-related toxicity in a murine model of environmental-triggered lupus. *Front Immunol.* 2022;13:972108.
2. Ionita IA, Akhlaghi F. Quantification of unbound prednisolone, prednisone, cortisol and cortisone in human plasma by ultrafiltration and direct injection into liquid chromatography tandem mass spectrometry. *Ann Clin Biochem.* 2010;47(Pt 4):350-357.

**Table S1.** MRM acquisition parameters for prednisone, prednisolone and the prednisone-d7 internal standard for the AB Sciex UPLC/MS/MS system.

| Q1 Mass (Da) | Q2 Mass (Da) | Dwell Time (msec) | Target compound    | MRM type | DP (volts) | EP (volts) | CE (volts) | CXP (volts) |
|--------------|--------------|-------------------|--------------------|----------|------------|------------|------------|-------------|
| 403.017      | 327          | 150               | Prednisone 1       | Quant    | -20        | -10        | -22        | -21         |
| 403.017      | 357.1        | 150               | Prednisone 2       | Qual     | -20        | -10        | -14        | -27         |
| 403.017      | 299.1        | 150               | Prednisone 3       | Qual     | -20        | -10        | -26        | -17         |
| 405.025      | 329.1        | 150               | Prednisolone 1     | Quant    | -15        | -10        | -22        | -21         |
| 405.025      | 295          | 150               | Prednisolone 2     | Qual     | -15        | -10        | -44        | -23         |
| 405.025      | 280          | 150               | Prednisolone 3     | Qual     | -15        | -10        | -46        | -23         |
| 426.1        | 109.9        | 150               | IS Prednisone d7 1 | IS Quant | -25        | -10        | -24        | -15         |
| 426.1        | 341.2        | 150               | IS Prednisone d7 2 | IS Qual  | -25        | -10        | -24        | -15         |
