# Supplementary material for: Prednisolone pharmacokinetics in dogs with protein‐losing enteropathy
Source: PubMed Central journal article supplement — J Vet Intern Med. 2024 Dec 23;39(1):e17277. doi: 10.1111/jvim.17277 (PMC11665961; doi:10.1111/jvim.17277), 2024-12-23
Supplement: JVIM-39-e17277-s005.pdf [file JVIM-39-e17277-s005.pdf]

**Supporting Information- Table S3** – Baseline demographic, clinical, ultrasonographic, and histologic data in 14 dogs with protein-losing enteropathy.

| Dog | Age (years) | Sex | Breed                          | Weight (kg) | BCS (0-9) | CCECAI | Purina fecal score (1-7) | AUS SI WT (y/n) | AUS PE (y/n) | AUS SI MS (y/n) | AUS SI HS (y/n) | Type of inflammatory infiltrate (LP, LPE, LPN) | Degree of inflammatory infiltrate (mild, moderate, marked) | LD (absent, mild, moderate, marked) | CD (absent, mild, moderate, marked) |
|-----|-------------|-----|--------------------------------|-------------|-----------|--------|--------------------------|-----------------|--------------|-----------------|-----------------|------------------------------------------------|------------------------------------------------------------|-------------------------------------|-------------------------------------|
| 1   | 2           | FS  | Pitbull                        | 24          | 5         | 18     | 7                        | y               | y            | n               | y               | LPN                                            | mild                                                       | absent                              | absent                              |
| 2   | 6           | FS  | Mixed                          | 22          | 4         | 11     | 6                        | y               | n            | n               | y               | LPE                                            | mild                                                       | marked                              | absent                              |
| 3   | 11          | MC  | GSD                            | 40          | 4         | 10     | 5                        | n               | n            | n               | n               | LPE                                            | moderate                                                   | moderate                            | absent                              |
| 4   | 6           | MC  | Miniature Australian shepherd  | 9           | 5         | 18     | 7                        | n               | y            | n               | y               | LPN                                            | moderate                                                   | mild                                | marked                              |
| 5   | 5           | MC  | French bulldog                 | 14          | 5         | 11     | 7                        | n               | n            | y               | n               | LPE                                            | marked                                                     | absent                              | mild                                |
| 6   | 3           | FS  | Yorkshire terrier              | 3.5         | 3         | 19     | 7                        | n               | y            | y               | y               | LPE                                            | moderate                                                   | moderate                            | mild                                |
| 7   | 9           | FS  | Newfoundland                   | 40          | 6         | 10     | 7                        | y               | y            | n               | y               | LP                                             | moderate                                                   | mild                                | mild                                |
| 8   | 2           | FS  | Labrador retriever             | 35          | 5         | 11     | 6                        | n               | y            | n               | y               | LPE                                            | moderate                                                   | marked                              | absent                              |
| 9   | 12          | MC  | Mixed                          | 6           | 4         | 17     | 6                        | n               | y            | n               | y               | LP                                             | marked                                                     | mild                                | moderate                            |
| 10  | 2           | MC  | GSD                            | 36          | 5         | 7      | 6                        | y               | n            | n               | n               | LP                                             | marked                                                     | absent                              | absent                              |
| 11  | 4           | MC  | Jack Russell terrier           | 12          | 6         | 9      | 7                        | y               | y            | n               | Y               | LPE                                            | moderate                                                   | mild                                | moderate                            |
| 12  | 7           | MC  | King Charles Cavalier spaniel  | 13          | 5         | 9      | 4                        | y               | y            | n               | n               | LPE                                            | moderate                                                   | mild                                | mild                                |
| 13  | 6           | MC  | Labrador retriever             | 30          | 4         | 5      | 5                        | n               | n            | n               | n               | LPE                                            | marked                                                     | mild                                | mild                                |
| 14  | 7           | FS  | American Staffordshire terrier | 26          | 5         | 6      | 6                        | n               | y            | n               | n               | LP                                             | marked                                                     | mild                                | mild                                |

Abbreviations: FS, female spayed; MC, male castrated; GSD, German shepherd dog; BCS, body condition score; CS, clinical signs; CCECAI, canine chronic enteropathy activity index; AUS, abdominal ultrasound; SI, small intestine; WT, wall thickening; PE, peritoneal effusion; MS, mucosal speckling; HS, hyperechoic mucosal striations; LP, lymphoplasmacytic; LPE, lymphoplasmacytic with eosinophils; LPN, lymphoplasmacytic with neutrophils; LD, lacteal dilation; CD, crypt dilation.
